# Supplementary material for: Trends in Chronic Kidney Disease Care in the US by Race and Ethnicity, 2012-2019
Source: PubMed Central journal article supplement (PMC8477264; doi:10.1001/jamanetworkopen.2021.27014), 2021-09-27
Supplement: jamanetwopen-e2127014-s002.pdf [file jamanetwopen-e2127014-s002.pdf]

\*Indicates required information. Only first name, last name, and suffix will appear in PubMed.

| <b>*Group Name(s): Centers for Disease Control and Prevention Chronic Kidney Disease Surveillance Team</b> |                   |                              |                  |                                         |                                          |                                                         |                                                                                            |
|------------------------------------------------------------------------------------------------------------|-------------------|------------------------------|------------------|-----------------------------------------|------------------------------------------|---------------------------------------------------------|--------------------------------------------------------------------------------------------|
| <b>*First Name and Middle Initial(s)</b>                                                                   | <b>*Last Name</b> | <b>*Suffix (eg, Jr, III)</b> | Academic Degrees | Institution                             | Location (city, state/province, country) | Role or Contribution, eg, chair, principal investigator | Group (if more than 1 Group listed in the byline and/or Subgroup (eg, Steering Committee)) |
| Neil                                                                                                       | Powe              |                              | MD, MPH, MBA     | University of California, San Francisco | San Francisco, CA                        | PI                                                      |                                                                                            |
| Rajiv                                                                                                      | Saran             |                              | MD               | University of Michigan                  | Ann Arbor, MI                            | PI                                                      |                                                                                            |
| Vahakn                                                                                                     | Shahinian         |                              | MD               | University of Michigan                  | Ann Arbor, MI                            |                                                         |                                                                                            |
| Michael                                                                                                    | Heung             |                              | MD               | University of Michigan                  | Ann Arbor, MI                            |                                                         |                                                                                            |
| Brenda                                                                                                     | Gillespie         |                              | PhD              | University of Michigan                  | Ann Arbor, MI                            |                                                         |                                                                                            |
| Hal                                                                                                        | Morgenstern       |                              | PhD              | University of Michigan                  | Ann Arbor, MI                            |                                                         |                                                                                            |
| William                                                                                                    | Herman            |                              | MD, MPH          | University of Michigan                  | Ann Arbor, MI                            |                                                         |                                                                                            |
| Kara                                                                                                       | Zivin             |                              | PhD              | University of Michigan                  | Ann Arbor, MI                            |                                                         |                                                                                            |
| Debbie                                                                                                     | Gipson            |                              | MD, MS           | University of Michigan                  | Ann Arbor, MI                            |                                                         |                                                                                            |
| Zubin                                                                                                      | Modi              |                              | MD               | University of Michigan                  | Ann Arbor, MI                            |                                                         |                                                                                            |
| Jennifer                                                                                                   | Bragg-Gresham     |                              | PhD              | University of Michigan                  | Ann Arbor, MI                            |                                                         |                                                                                            |
| Diane                                                                                                      | Steffick          |                              | PhD              | University of Michigan                  | Ann Arbor, MI                            |                                                         |                                                                                            |
| Yun                                                                                                        | Han               |                              | PhD              | University of Michigan                  | Ann Arbor, MI                            |                                                         |                                                                                            |
| Xiaosong                                                                                                   | Zhang             |                              | MA               | University of Michigan                  | Ann Arbor, MI                            |                                                         |                                                                                            |
| April                                                                                                      | Wyncott           |                              | MPH              | University of Michigan                  | Ann Arbor, MI                            |                                                         |                                                                                            |
| Tanushree                                                                                                  | Banerjee          |                              | PhD              | University of California, San Francisco | San Francisco, CA                        |                                                         |                                                                                            |
| Delphine                                                                                                   | Tuot              |                              | MDCM, MAS        | University of California, San Francisco | San Francisco, CA                        |                                                         |                                                                                            |
| Chi                                                                                                        | Chu               |                              | MD, MAS          | University of California, San Francisco | San Francisco, CA                        |                                                         |                                                                                            |
| Chi-yuan                                                                                                   | Hsu               |                              | MD, MSc          | University of California, San Francisco | San Francisco, CA                        |                                                         |                                                                                            |
| Josef                                                                                                      | Coresh            |                              | MD, PhD          | Johns Hopkins University                | Baltimore, MD                            |                                                         |                                                                                            |
| Charles                                                                                                    | McCulloch         |                              | PhD              | University of California, San Francisco | San Francisco, CA                        |                                                         |                                                                                            |

Supplemental Online Content: Nonauthor Collaborators

\*Indicates required information. Only first name, last name, and suffix will appear in PubMed.

| *First Name and Middle Initial(s) | *Last Name   | *Suffix (eg, Jr, III) | Academic Degrees | Institution                                | Location (city, state/province, country) | Role or Contribution, eg, chair, principal investigator | Group (if more than 1 Group listed in the byline) and/or Subgroup (eg, Steering Committee) |
|-----------------------------------|--------------|-----------------------|------------------|--------------------------------------------|------------------------------------------|---------------------------------------------------------|--------------------------------------------------------------------------------------------|
| Deidra                            | Crews        |                       | MD, ScM          | Johns Hopkins University                   | Baltimore, MD                            |                                                         |                                                                                            |
| Janet                             | Pella        |                       | BS               | University of California, San Francisco    | San Francisco, CA                        |                                                         |                                                                                            |
| Nilka                             | Ríos Burrows |                       | MPH              | Centers for Disease Control and Prevention | Atlanta, GA                              |                                                         |                                                                                            |
| Mark                              | Eberhardt    |                       | PhD              | Centers for Disease Control and Prevention | Atlanta, GA                              |                                                         |                                                                                            |
| Alain                             | Koyama       |                       | ScD              | Centers for Disease Control and Prevention | Atlanta, GA                              |                                                         |                                                                                            |
| Juanita                           | Mondesire    |                       |                  | Centers for Disease Control and Prevention | Atlanta, GA                              |                                                         |                                                                                            |
| Meda                              | Pavkov       |                       | MD, PhD          | Centers for Disease Control and Prevention | Atlanta, GA                              |                                                         |                                                                                            |
| Deborah                           | Rolka        |                       | MS               | Centers for Disease Control and Prevention | Atlanta, GA                              |                                                         |                                                                                            |
| Sharon                            | Saydah       |                       | PhD              | Centers for Disease Control and Prevention | Atlanta, GA                              |                                                         |                                                                                            |
